# Supplementary material for: Projecting Suitability and Climate Vulnerability of Bhutanitis thaidina (Blanchard) (Lepidoptera: Papilionidae) with Conservation Implications
Source: PubMed Central journal article supplement (PMC6817869; doi:10.1038/s41598-019-51972-6), 2019-10-28
Supplement: 41598_2019_51972_MOESM1_ESM.pdf [file 41598_2019_51972_MOESM1_ESM.pdf]

## Supplementary information

### **Projecting Suitability and Climate Vulnerability of *Bhutanitis thaidina* (Blanchard) (Lepidoptera: Papilionidae) with Conservation Implications**

Shao-Ji Hu<sup>1,2,+</sup>, Dong-Hui Xing<sup>3,+</sup>, Zhi-Xian Gong<sup>4</sup>, Jin-Ming Hu<sup>1,2,\*</sup>

1. Yunnan Key Laboratory of International Rivers and Transboundary Eco-security, Yunnan University, Kunming, 650500, China

2. Institute of International Rivers and Eco-security, Yunnan University, Kunming, 650500, China

3. School of Agriculture, Yunnan University, Kunming, 650500, China

4. Yulong Xueshan Provincial Nature Reserve, Yulong, 674100, China

+ Joint first authors

\* Corresponding author: [hujm@ynu.edu.cn](mailto:hujm@ynu.edu.cn)

TABLE S1 Presence-only data records used for ENFA and MaxEnt analyses in the present research.

| Locality                                | Species    | Lon.       | Lat.      | Value |
|-----------------------------------------|------------|------------|-----------|-------|
| Dalongtan, Shennongjia, Hubei           | B_thaidina | 110.311541 | 31.496622 | 1     |
| Dalongtan, Shennongjia, Hubei           | B_thaidina | 110.306310 | 31.494298 | 1     |
| Changsong Ping, Lijiang, Yunnan         | B_thaidina | 100.131330 | 27.043526 | 1     |
| Forest Park, Dongchuan, Yunnan          | B_thaidina | 103.220353 | 26.113961 | 1     |
| Lanni Ping, Dongchuan, Yunnan           | B_thaidina | 102.985180 | 26.170230 | 1     |
| Luoxue, Dongchuan, Yunnan               | B_thaidina | 102.950082 | 26.298928 | 1     |
| Jiaozi Xueshan, Luquan, Yunnan          | B_thaidina | 102.792020 | 26.017949 | 1     |
| Heqing, , Yunnan                        | B_thaidina | 100.226138 | 26.577384 | 1     |
| Fangniu Ping, Heqing, Yunnan            | B_thaidina | 100.181021 | 26.684531 | 1     |
| Jianchuan, Yunnan                       | B_thaidina | 99.877868  | 26.545135 | 1     |
| Tianchi, Yunlong, Yunnan                | B_thaidina | 99.293331  | 25.870900 | 1     |
| Ludian, Lijiang, Yunnan                 | B_thaidina | 99.454900  | 27.184844 | 1     |
| Wagai, Judian, Lijiang, Yunnan          | B_thaidina | 99.567004  | 27.258471 | 1     |
| Chongjiang River, Zhongdian, Yunnan     | B_thaidina | 99.953225  | 27.362652 | 1     |
| Tuguancun, Zhongdian, Yunnan            | B_thaidina | 99.969232  | 27.366396 | 1     |
| Yunshan Ping, Yulong Xueshan, Yunnan    | B_thaidina | 100.233790 | 27.129949 | 1     |
| Baishui, Yulong Xueshan, Yunnan         | B_thaidina | 100.266980 | 27.135189 | 1     |
| Heishui, Yulong Xueshan, Yunnan         | B_thaidina | 100.252892 | 27.145871 | 1     |
| Napa, Deqen, Yunnan                     | B_thaidina | 99.622975  | 27.867600 | 1     |
| Cizhong, Deqen, Yunnan                  | B_thaidina | 98.903219  | 28.075132 | 1     |
| Tse-Kou (Yanmen), Deqen, Yunnan         | B_thaidina | 98.903249  | 28.078321 | 1     |
| Weixi, Yunnan                           | B_thaidina | 99.286562  | 27.175044 | 1     |
| 10 km SE of Weixi, Yunnan               | B_thaidina | 99.339444  | 27.766666 | 1     |
| Xiao Weixi, Weixi, Yunnan               | B_thaidina | 99.062346  | 27.444749 | 1     |
| Zhaotong, Yunnan                        | B_thaidina | 103.624228 | 27.381016 | 1     |
| Yanjin, Yunnan                          | B_thaidina | 103.767829 | 28.092838 | 1     |
| Qiaojia, Yunnan                         | B_thaidina | 102.968013 | 26.930059 | 1     |
| Weining, Guizhou                        | B_thaidina | 104.456645 | 26.908322 | 1     |
| Moupin, Sichuan                         | B_thaidina | 102.827286 | 30.352020 | 1     |
| Siao-Lou, Sichuan                       | B_thaidina | 102.610339 | 30.138339 | 1     |
| Lizi Ping, Shimian, Sichuan             | B_thaidina | 102.328858 | 28.952355 | 1     |
| Yanzi Gou, Luding, Sichuan              | B_thaidina | 102.082319 | 29.687156 | 1     |
| Xinxing, Luding, Sichuan                | B_thaidina | 102.079691 | 29.674463 | 1     |
| Moxi, Luding, Sichuan                   | B_thaidina | 102.138731 | 29.677025 | 1     |
| Wolong, Sichuan                         | B_thaidina | 103.187620 | 31.031050 | 1     |
| Xuankou, Guanxian (Dujiangyan), Sichuan | B_thaidina | 103.502852 | 30.964680 | 1     |
| Erlang Shan, Sichuan                    | B_thaidina | 102.288122 | 29.849450 | 1     |
| Gudao, Erlang Shan, Sichuan             | B_thaidina | 102.235734 | 29.834715 | 1     |
| Gongga Shan, Sichuan                    | B_thaidina | 102.879425 | 29.596008 | 1     |
| Ta-tsien-lou (Kangding), Sichuan        | B_thaidina | 101.958140 | 29.997335 | 1     |
| Upper Wasi Gou, Kangding, Sichuan       | B_thaidina | 102.142502 | 30.066043 | 1     |

|                                                    |            |            |           |   |
|----------------------------------------------------|------------|------------|-----------|---|
| Hongxi, Meigu, Sichuan                             | B_thaidina | 103.120473 | 28.685130 | 1 |
| Longxi-Hongkou Nature Reserve, Dujiangyan, Sichuan | B_thaidina | 103.663391 | 31.097091 | 1 |
| Chiufunshan, Szechuan                              | B_thaidina | 103.864035 | 31.372552 | 1 |
| Pengzhou, Sichuan                                  | B_thaidina | 103.897900 | 31.299516 | 1 |
| Qingcheng Shan, Dujiangyan, Sichuan                | B_thaidina | 103.521152 | 30.982234 | 1 |
| Longxigou, Jiulong, Sichuan                        | B_thaidina | 101.542591 | 28.851659 | 1 |
| 20 km S. of Jiulong, Sichuan                       | B_thaidina | 101.648462 | 28.816427 | 1 |
| Lizi Ping, Muli, Sichuan                           | B_thaidina | 101.214995 | 28.003555 | 1 |
| Heizhu Gou, Ebian, Sichuan                         | B_thaidina | 103.092561 | 29.012637 | 1 |
| Headwater of Jialing River, Tsinling, Shaanxi      | B_thaidina | 106.935947 | 34.247600 | 1 |
| Tapaishan im Tsinling, Sued-Shensi                 | B_thaidina | 107.814101 | 33.960308 | 1 |
| Diaoyutai, Taibai Shan, Shaanxi                    | B_thaidina | 107.476877 | 34.165352 | 1 |
| Laoxiancheng, Taibai Shan, Shaanxi                 | B_thaidina | 107.757567 | 33.794706 | 1 |
| Hougou, Taibai Shan, Shaanxi                       | B_thaidina | 107.370756 | 34.063692 | 1 |
| Hualong Shan Nature Reserve, Shaanxi               | B_thaidina | 109.175944 | 32.033930 | 1 |
| Maiji, Xiaolong Shan, Gansu                        | B_thaidina | 105.978537 | 34.403990 | 1 |
| Maiji Shan, Gansu                                  | B_thaidina | 106.342150 | 34.285779 | 1 |
| Yunping, Xiaolong Shan, Gansu                      | B_thaidina | 106.504828 | 33.594281 | 1 |
| near Shangdao Yu, Gansu                            | B_thaidina | 104.157040 | 33.674818 | 1 |
| near Diebu, Gansu                                  | B_thaidina | 103.112819 | 34.193928 | 1 |

---

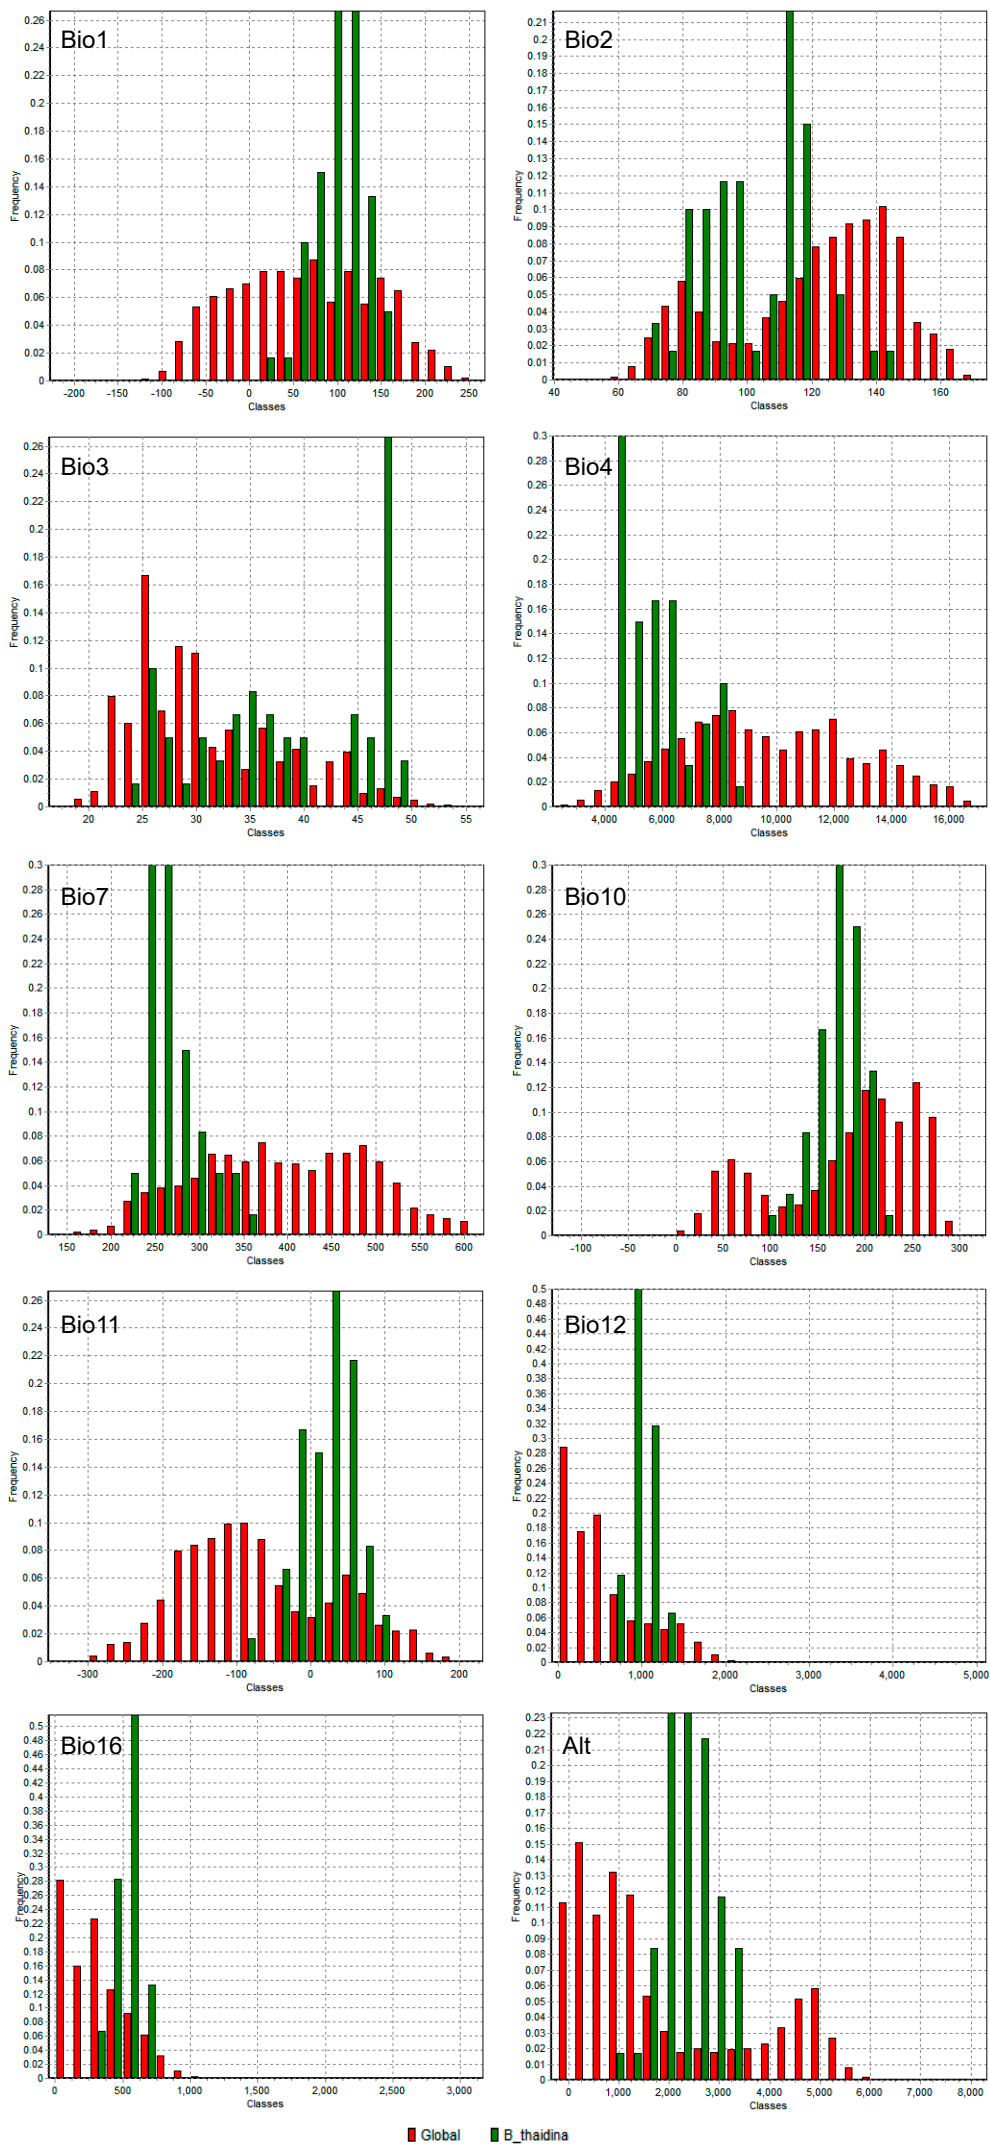

Figure S1. Frequency distribution of EGVs in China and the range of *B. thaidina*
